# Supplementary material for: Dietary intake of probiotic fermented milk benefits the gut and reproductive health in mice fed with an obesogenic diet
Source: Royal Society of Chemistry journal article supplement (doi:10.1039/d1fo02501e), 2021-12-06
Supplement: d1fo02501e1.pdf [file d1fo02501e1.pdf]

| <b>Gene name</b> | <b>Sense Primer<br/>(5'-----3')</b> | <b>Anti-sense Primer (5'-----3')</b> | <b>Annealing<br/>Temp.</b> | <b>Product<br/>length</b> |
|------------------|-------------------------------------|--------------------------------------|----------------------------|---------------------------|
| GAPDH            | TGTGTCCGTCGTGGATCTGA                | TTGCTGTTGAAGTCGCAGGAG                | 60°C                       | 150                       |
| StAR             | CTGCAGCAAGCACTGTGTGG                | GGGATAACAGCTCAGACGGTAGAGA            | 60°C                       | 87                        |
| P450scc          | GGAGGAGATCGTGGACCCTGA               | TGGAGGCATGTTGAGCATGG                 | 60°C                       | 91                        |
| 17 $\beta$ HSD   | AATGTGCTTTCCATTTGCAAGGT             | ATGCCACTGGCAGAGGAGATG                | 60°C                       | 98                        |
| Aromatase        | CACTACATCTCCCGATTCCGG               | GCCCTGGTCTTGTTCGAATG                 | 60.5°C                     | 151                       |
| Leptin           | TCACACACGCAGTCGGTATC                | ACTCAGAATGGGGTGAAGCC                 | 60.5°C                     | 78                        |
| IL-6             | CACTTCACAAGTCGGAGGCT                | TCTGACAGTGCATCATCGCT                 | 59.97°C                    | 114                       |
| TNF-Alpha        | AGCCGATGGGTTGTACCTTGCTA             | TGAGATAGCAAATCGGCTGACGGT             | 60.43°C                    | 103                       |
| IL-10            | CTGCTATGCTGCCTGCTCTT                | GCAGTATGTTGCCAGCTGG                  | 60.5°C                     | 181                       |
